# Supplementary material
Source: PubMed Central journal article supplement (PMC5404534)
Supplement: AAC.02534-16_zac005176115s1.pdf [file AAC.02534-16_zac005176115s1.pdf]

**Supplemental Table 1. Primers used in this study.**

| <b>Mutation</b> |         | <b>Sequence (5' to 3')</b>       |
|-----------------|---------|----------------------------------|
| KPC3_D179Y      | Forward | CGATGCGCGC <u>t</u> ATACCTCATC   |
|                 | Reverse | CCTGGGATGGCGGAGTTC               |
| KPC3_T243M      | Forward | GTGTATGGCA <u>t</u> GGCAAATGAC   |
|                 | Reverse | TCCGCAGGTTCCGGTTTT               |
| 165-166EL-ins   | Forward | <u>gagctg</u> AACTCCGCCATCCCAGGC |
|                 | Reverse | CAGCTCCAGCTCCCAGCG               |

Lower case, underlined nucleotides indicate the nucleotides that were introduced.
